# Supplementary material
Source: MDPI journal article supplement (https://www.mdpi.com/2071-1050/10/5/1453)
Supplement: s1 [file s1]

# QUESTIONNAIRE: THE EFFECT OF CLIMATE VARIABILITY ON SMALL-SCALE FISH FARMING

## INFORMED CONSENT

| Household identification and interview summary |                                                                                                                                                                                                                                                                                          |
|------------------------------------------------|------------------------------------------------------------------------------------------------------------------------------------------------------------------------------------------------------------------------------------------------------------------------------------------|
| 101 District (name):                           | _____ Code   ____   ____                                                                                                                                                                                                                                                                 |
| 01= Nkhotakota                                 |                                                                                                                                                                                                                                                                                          |
| 102 Region                                     | _____ Code   ____   ____                                                                                                                                                                                                                                                                 |
| 01= Central                                    |                                                                                                                                                                                                                                                                                          |
| 103 Respondent Name                            | _____                                                                                                                                                                                                                                                                                    |
| 104 Traditional Authority (name):              | _____ Code:   ____   ____                                                                                                                                                                                                                                                                |
| 105 Group Village Headman (name)               | _____ Code:   ____   ____                                                                                                                                                                                                                                                                |
| 106 Village name:                              | _____ Code:   ____   ____                                                                                                                                                                                                                                                                |
| 107 Research Assistant Name                    | _____                                                                                                                                                                                                                                                                                    |
| 108 Questionnaire Number                       | ____   ____   ____   ____                                                                                                                                                                                                                                                                |
| 109 Date of interview                          | <div style="display: flex; justify-content: space-around; font-weight: bold;"> <span>D</span><span>D</span><span>M</span><span>M</span><span>Y</span><span>Y</span><span>Y</span><span>Y</span> </div>   ____   ____     ____   ____     ____   ____   ____   ____   Starting time _____ |
| To be completed after interview has been done  |                                                                                                                                                                                                                                                                                          |
| Peer Reviewed by.....                          | <div style="display: flex; justify-content: space-around; font-weight: bold;"> <span>D</span><span>D</span><span>M</span><span>M</span><span>Y</span><span>Y</span><span>Y</span><span>Y</span> </div>   ____   ____     ____   ____     ____   ____   ____   ____                       |
| Name of supervisor                             | _____                                                                                                                                                                                                                                                                                    |
| Checked :                                      | <div style="display: flex; justify-content: space-around; font-weight: bold;"> <span>D</span><span>D</span><span>M</span><span>M</span><span>Y</span><span>Y</span><span>Y</span><span>Y</span> </div>   ____   ____     ____   ____     ____   ____   ____   ____                       |
| Data entry clerk                               | _____                                                                                                                                                                                                                                                                                    |
| Date of data entry                             | _____                                                                                                                                                                                                                                                                                    |

## MODULE 2A: HOUSEHOLD COMPOSITION

|     |                           | A1 <sup>1)</sup> | A2 <sup>2)</sup> | A3         | A4a <sup>3)</sup> | A4b <sup>4)</sup>     | A5 <sup>5)</sup> | A6                                        |
|-----|---------------------------|------------------|------------------|------------|-------------------|-----------------------|------------------|-------------------------------------------|
| ID  | Position in HH            | Sex              | Marital status   | Age (yrs.) | Education         | Other skills training | Main occupation  | How long have you lived here (no of yrs.) |
| 201 | Head of HH                |                  |                  |            |                   |                       |                  |                                           |
| 202 | Spouse                    |                  |                  |            |                   |                       |                  |                                           |
| 203 | Respondent not 201 or 202 |                  |                  |            |                   |                       |                  |                                           |

1) Codes: 1=male; 2=female

2) Codes: 1= single; 2=married; 3=divorced; 4=separated; 5=widowed; 6=cohabiting

3) Codes: 1= no formal education; 2=primary; 3=secondary; 4=higher education (college, university or similar)

4) Codes= 1=agricultural management skills; 2=fisheries management skills; 3=business skills; 4= other specify

5) Codes: 1=agriculture; 2=fishing; 3=hunting; 4 business, 5=house wife; 6= other specify

## MODULE 2B: HOUSEHOLD STRUCTURE

(Include all members who are largely dependent on the household head for livelihoods)

| Category of household/s members                                                                                                                                    | Male | Female |
|--------------------------------------------------------------------------------------------------------------------------------------------------------------------|------|--------|
| 204. Number of children under the age of 15 years                                                                                                                  |      |        |
| 205. Number of elder persons (70+ years) in the household                                                                                                          |      |        |
| 206. Number of adults (between ages of 15 and 70 years) who are largely unable to assist the household with its farming activities due to ill health or disability |      |        |
| 207. Number of able bodied adults (15-70 yrs) <b>present</b> in the household                                                                                      |      |        |
| 208. Number of adult members of the household who are <b>absent</b> and dependent on the household for support                                                     |      |        |

## MODULE 3: HOUSEHOLD ACCESS TO AND USE OF LAND AND NATURAL RESOURCES

### Access to and use of grazing resources

301. Indicate the number of the different types of livestock the household has and uses to provide for their food and income requirements:

| Livestock type           | Number |
|--------------------------|--------|
| Cattle                   |        |
| Goats                    |        |
| Sheep                    |        |
| Donkeys                  |        |
| Pigs                     |        |
| Chickens (& other birds) |        |
| Other:                   |        |

302a. Do you have access to grazing land?

|     |    |
|-----|----|
| Yes | No |
|-----|----|

302b. If yes, is this land communally owed or your own?

|          |     |
|----------|-----|
| Communal | Own |
|----------|-----|

303. Indicate the quality of the grazing land available to the household:

|      |      |           |
|------|------|-----------|
| Poor | Good | Excellent |
|------|------|-----------|

304. Access to arable land and use of this land

(Due to different measures [hectares and acres] of land area the enumerators need to be able to estimate areas of land independently from the respondent) Note that 1 hectare = 2.4 acres

| Characteristics    | Arable Area 1                                                                                                                                                                                                                                                                                                                                                                              |       | Arable Area 2 |       | Arable Area 3 |       | Arable Area 4 |       | Arable Area 5 |       | Arable Area 6 |       | Arable Area 7 |       |
|--------------------|--------------------------------------------------------------------------------------------------------------------------------------------------------------------------------------------------------------------------------------------------------------------------------------------------------------------------------------------------------------------------------------------|-------|---------------|-------|---------------|-------|---------------|-------|---------------|-------|---------------|-------|---------------|-------|
| Size/ Area (acres) |                                                                                                                                                                                                                                                                                                                                                                                            |       |               |       |               |       |               |       |               |       |               |       |               |       |
| Soil Quality       |                                                                                                                                                                                                                                                                                                                                                                                            |       |               |       |               |       |               |       |               |       |               |       |               |       |
| Irrigated Y/N      |                                                                                                                                                                                                                                                                                                                                                                                            |       |               |       |               |       |               |       |               |       |               |       |               |       |
| 305.               | Indicate below the proportion (%) of field (or area) planted to each crop during this 2015/2016 growing season (more than one crop can be grown in any field). Also, the quantity of each crop harvested from each land area per year should be indicated. Care should be taken to determine the measure that these quantities are represented in. For example, 50kg or 90kg bag of maize. |       |               |       |               |       |               |       |               |       |               |       |               |       |
|                    | %                                                                                                                                                                                                                                                                                                                                                                                          | Yield | %             | Yield | %             | Yield | %             | Yield | %             | Yield | %             | Yield | %             | Yield |
| a. Summer Maize    |                                                                                                                                                                                                                                                                                                                                                                                            |       |               |       |               |       |               |       |               |       |               |       |               |       |
| b. Winter Maize    |                                                                                                                                                                                                                                                                                                                                                                                            |       |               |       |               |       |               |       |               |       |               |       |               |       |
| c. Cassava         |                                                                                                                                                                                                                                                                                                                                                                                            |       |               |       |               |       |               |       |               |       |               |       |               |       |
| d. Millet          |                                                                                                                                                                                                                                                                                                                                                                                            |       |               |       |               |       |               |       |               |       |               |       |               |       |

| Characteristics  | Arable Area 1 |  | Arable Area 2 |  | Arable Area 3 |  | Arable Area 4 |  | Arable Area 5 |  | Arable Area 6 |  | Arable Area 7 |  |
|------------------|---------------|--|---------------|--|---------------|--|---------------|--|---------------|--|---------------|--|---------------|--|
| e. Sorghum       |               |  |               |  |               |  |               |  |               |  |               |  |               |  |
| f. Wheat         |               |  |               |  |               |  |               |  |               |  |               |  |               |  |
| g. Beans         |               |  |               |  |               |  |               |  |               |  |               |  |               |  |
| h. Soya beans    |               |  |               |  |               |  |               |  |               |  |               |  |               |  |
| i. Pigeon peas   |               |  |               |  |               |  |               |  |               |  |               |  |               |  |
| j. Ground-nuts   |               |  |               |  |               |  |               |  |               |  |               |  |               |  |
| k. Peas          |               |  |               |  |               |  |               |  |               |  |               |  |               |  |
| l. Pumpkins      |               |  |               |  |               |  |               |  |               |  |               |  |               |  |
| m. Pineapple     |               |  |               |  |               |  |               |  |               |  |               |  |               |  |
| n. Vegetables    |               |  |               |  |               |  |               |  |               |  |               |  |               |  |
| o. Tobacco       |               |  |               |  |               |  |               |  |               |  |               |  |               |  |
| p. Coffee        |               |  |               |  |               |  |               |  |               |  |               |  |               |  |
| q. Bananas       |               |  |               |  |               |  |               |  |               |  |               |  |               |  |
| r. Mangos        |               |  |               |  |               |  |               |  |               |  |               |  |               |  |
| s. Cotton        |               |  |               |  |               |  |               |  |               |  |               |  |               |  |
| t. Other specify |               |  |               |  |               |  |               |  |               |  |               |  |               |  |
| u. Other specify |               |  |               |  |               |  |               |  |               |  |               |  |               |  |

306. What are amounts of fingerlings, seed, fertilizers and chemicals/pesticides applied in field?

| Crop          | Seed used |        | Fertilizer amount applied |      |        | Chemicals/pesticides amount applied |      |        |
|---------------|-----------|--------|---------------------------|------|--------|-------------------------------------|------|--------|
|               | Unit      | Amount | Type                      | Unit | Amount | Type                                | Unit | Amount |
| Fingerlings   |           |        |                           |      |        |                                     |      |        |
| Maize         |           |        |                           |      |        |                                     |      |        |
| Rice          |           |        |                           |      |        |                                     |      |        |
| Cassava       |           |        |                           |      |        |                                     |      |        |
| Tomato        |           |        |                           |      |        |                                     |      |        |
| Tobacco       |           |        |                           |      |        |                                     |      |        |
| Fish          |           |        |                           |      |        |                                     |      |        |
| Other specify |           |        |                           |      |        |                                     |      |        |
| Other specify |           |        |                           |      |        |                                     |      |        |
|               |           |        |                           |      |        |                                     |      |        |
|               |           |        |                           |      |        |                                     |      |        |

**307. UNUSED LAND**

| Characteristics          | Unused land | Rented to someone else |
|--------------------------|-------------|------------------------|
| Size/Area (acres)        |             |                        |
| Soil Quality             |             |                        |
| Potential for irrigation | Y/N         |                        |

**ACCESS TO WATER**

308. Do you have access to water for cultivation and/or ponds?

|     |    |
|-----|----|
| Yes | No |
|-----|----|

309. Where do you source this water from:

|                                       |                                 |                      |      |                      |
|---------------------------------------|---------------------------------|----------------------|------|----------------------|
| Individual furrow from a river/stream | From a shared irrigation furrow | Furrow from a spring | Well | Ground water seepage |
|                                       |                                 |                      |      |                      |

310. Indicate the relative amounts of water you have access to for irrigation and/or ponds during each month of the year.

|                 |        | Jun | Jul | Aug | Sep | Oct | Nov | Dec | Jan | Feb | Mar | Apr | May |
|-----------------|--------|-----|-----|-----|-----|-----|-----|-----|-----|-----|-----|-----|-----|
| Relative Amount | Irrig. |     |     |     |     |     |     |     |     |     |     |     |     |
|                 | Ponds  |     |     |     |     |     |     |     |     |     |     |     |     |

To indicate relative amount, ask respondent to rank the water supply for each month from 0 – 1. (0 being no flow and 1 being the strongest flow)

311. If the supply of water is variable, what are the factors that cause this variability?

|                          |             |                              |                     |             |
|--------------------------|-------------|------------------------------|---------------------|-------------|
| Rainfall (flood/drought) | Stream flow | Competition from other users | Seepage from furrow | Evaporation |
|                          |             |                              |                     |             |

312. Is there enough water available to support additional ponds and/or larger areas of irrigated cultivation?

|     |    |
|-----|----|
| Yes | No |
|-----|----|

313. If there is enough water to allow expansion, what would be the preferred use for this water?

|                          |               |          |
|--------------------------|---------------|----------|
| 1. Irrigated cultivation | 2. Fish Ponds | 3. Other |
|                          |               |          |

## MODULE 4: HOUSEHOLD LIVELIHOODS AND WEALTH INDICATORS

401. Indicate in the table below the sources of income obtained by the households and the relative proportions that each of these sources contribute to total household income.

Indicate in the table below the period of the year in which each source of income is received or generated.

| Source of household income                                               | Tick if Yes | Contribution to total annual household income (%) | Period during which this income is received |
|--------------------------------------------------------------------------|-------------|---------------------------------------------------|---------------------------------------------|
| a. Full-time formal employment                                           |             |                                                   |                                             |
| b. Part-time formal employment                                           |             |                                                   |                                             |
| c. Owner business (artisan, shop-keeper, taxi driver, etc)               |             |                                                   |                                             |
| d. Casual/temporary off-farm employment                                  |             |                                                   |                                             |
| e. Seasonal farm employment for money                                    |             |                                                   |                                             |
| f. Pension or Welfare grant                                              |             |                                                   |                                             |
| g. Remittances                                                           |             |                                                   |                                             |
| h. Sale of tobacco                                                       |             |                                                   |                                             |
| i. Sale of coffee                                                        |             |                                                   |                                             |
| j. Sale of fruit and vegetables                                          |             |                                                   |                                             |
| k. Sale of food crops (Maize, cassava, beans, groundnuts, pumpkins, etc) |             |                                                   |                                             |
| l. Sale of cotton                                                        |             |                                                   |                                             |
| m. Sale of cattle, sheep or goats                                        |             |                                                   |                                             |
| n. Sale of pigs and chickens                                             |             |                                                   |                                             |
| o. Sale of milk and eggs                                                 |             |                                                   |                                             |
| p. Sale of hides and skins                                               |             |                                                   |                                             |
| q. Sale of fish                                                          |             |                                                   |                                             |
| r. Rent                                                                  |             |                                                   |                                             |
| s. Other                                                                 |             |                                                   |                                             |
| Total                                                                    |             | (100%)                                            |                                             |

402. Indicate the proportion of income spent on the following items:

| Expenditure Items                                   | Proportion of annual income spent (%) |
|-----------------------------------------------------|---------------------------------------|
| a. Education (fees + uniforms, etc)                 |                                       |
| b. Transport                                        |                                       |
| c. Maize, cassava or rice for household consumption |                                       |
| d. Fish for hh consumption                          |                                       |
| e. Other foods for hh consumption                   |                                       |

| Expenditure Items                             | Proportion of annual income spent (%) |
|-----------------------------------------------|---------------------------------------|
| f. Building materials                         |                                       |
| g. Clothing & blankets                        |                                       |
| h. Furnishings and domestic utensils          |                                       |
| i. Tools and inputs for productive activities |                                       |
| j. Luxuries (non-essential items)             |                                       |
| k. Labour                                     |                                       |
| l. Rents                                      |                                       |
| m. Others                                     |                                       |

403. Does the household have the following assets: (tick those they have)?

| Asset name                 | Quantity | Year purchased / given | Cost of asset |
|----------------------------|----------|------------------------|---------------|
| a. Radio/music player      |          |                        |               |
| b. Bicycle                 |          |                        |               |
| c. Motor Vehicle           |          |                        |               |
| d. Tractor                 |          |                        |               |
| e. Net for fish harvesting |          |                        |               |
| f. Wheel-barrow            |          |                        |               |
| g. Oxcart                  |          |                        |               |
| h. Iron sheets on house    |          |                        |               |
| i. Hoes (number?)          |          |                        |               |
| j. Others                  |          |                        |               |

#### MODULE 404: FOOD SECURITY

401a. Are there periods during the year when your household has nothing or very little food to eat from on-farm production?

|     |    |
|-----|----|
| Yes | No |
|-----|----|

401b. If yes, please indicate these periods in the table below and rank the degree of on-farm food shortage from 0-3.

Zero (0) = no lack of food, 1 = a lack of protein (relish) but no shortage of other foods, 2 = no staple but other sources of relish and vegetables, 3 = no staple food or other sources of food.

401c. Please also indicate in the table when it is necessary to buy staple foods such as maize, cassava or rice for household consumption. (Tick months when staple food needs to be bought)

|          | Jun | Jul | Aug | Sep | Oct | Nov | Dec | Jan | Feb | Mar | Apr | May |
|----------|-----|-----|-----|-----|-----|-----|-----|-----|-----|-----|-----|-----|
| Own food |     |     |     |     |     |     |     |     |     |     |     |     |
| Buy      |     |     |     |     |     |     |     |     |     |     |     |     |

402a. Does the household engage in Ganyu?

|     |    |
|-----|----|
| Yes | No |
|-----|----|

402b. Indicate the periods of the year when Ganyu is engaged in.

| Jun | Jul | Aug | Sep | Oct | Nov | Dec | Jan | Feb | Mar | Apr | May |
|-----|-----|-----|-----|-----|-----|-----|-----|-----|-----|-----|-----|
|     |     |     |     |     |     |     |     |     |     |     |     |

403. Based on the discussions held with the farmer and observation of the household, enumerators are to provide a general opinion as to the level of food security that a household enjoys. (This is used simply to back-up the information recorded in 26 above and does not replace it.)

|                |                          |                  |
|----------------|--------------------------|------------------|
| 1. Food secure | 2. Partially food secure | 3. Food insecure |
|----------------|--------------------------|------------------|

## MODULE 5: FISH FARMING ACTIVITIES

501a. Are you currently involved in fish farming?

|     |    |
|-----|----|
| Yes | No |
|-----|----|

**If no:**

501b. Have they been involved in fish farming before (during earlier period)?

|     |    |
|-----|----|
| Yes | No |
|-----|----|

**If yes:**

501c. During what period did they engage in fish farming?

.....

.....

.....

501d. Why did they stop fish farming?

.....

.....

.....

**If they are currently involved in fish farming:**

502. Why did they first become involved in fish farming?

|                         |                    |                |          |
|-------------------------|--------------------|----------------|----------|
| a. Fish farming Project | b. Self-motivation | c. Inheritance | d. Other |
|-------------------------|--------------------|----------------|----------|



503. Are you a member of a fish farming club?

|     |    |
|-----|----|
| Yes | No |
|-----|----|

504. What are the conditions for one to be a member?

.....

.....

.....

505. What are services provided by the club?

.....

.....

.....

506. How has these services improved your livelihoods?

.....

.....

.....

**If they are currently or were previously involved in fish farming:**

507. From whom/where did they get the information and advice they needed to start and maintain fish farming?

| Source of Information                  | Tick |
|----------------------------------------|------|
| a. Father/Grandfather/Uncle/Guardian   |      |
| b. Discussion with neighbours          |      |
| c. Observation of neighbours           |      |
| d. Fish Farmers Club                   |      |
| e. Fisheries Extension Officer         |      |
| f. Project/NGO                         |      |
| g. Name Project:                       |      |
| h. Reading material                    |      |
| i. Radio                               |      |
| j. School                              |      |
| k. Fish farming training (From whom?): |      |

Respondent may indicate more than one source of information

508a. Who in the household is mainly responsible for the fish farming activities?

|                      |                             |
|----------------------|-----------------------------|
| 1. Head of Household | 2. Another household member |
|----------------------|-----------------------------|

**508b.** If the person mainly responsible for the household's fish farming activities is **not the head of the household (respondent)** please provide the details of the person responsible in the table below:

| Person Responsible for Fish Farming | Characteristics |
|-------------------------------------|-----------------|
| a. Age                              |                 |
| b. Male / Female                    |                 |
| c. Highest level of education       |                 |
| d. Relationship to household head   |                 |

### Fish Ponds

509. To be answered by those currently involved in fish farming as well as those who may have been engaged in fish farming in the past (but not currently).

| Characteristics                                          | Pond 1                               | Pond 2                               | Pond 3                               |
|----------------------------------------------------------|--------------------------------------|--------------------------------------|--------------------------------------|
| a. How did you get a pond?                               |                                      |                                      |                                      |
| b. Year of construction                                  |                                      |                                      |                                      |
| c. Cost for each (MK)                                    |                                      |                                      |                                      |
| d. Length of pond                                        |                                      |                                      |                                      |
| e. Breadth of pond                                       |                                      |                                      |                                      |
| f. Date of last stocking                                 |                                      |                                      |                                      |
| g. Number of each species put into pond at last stocking | TR =<br>OS =<br>CG =<br>OK =<br>CC = | TR =<br>OS =<br>CG =<br>OK =<br>CC = | TR =<br>OS =<br>CG =<br>OK =<br>CC = |
| h. Month and year of last large harvest                  |                                      |                                      |                                      |

### Choices for a & g

a: How did you get a pond? 1 = inherited; 2 = Self constructed; 3 = constructed with paid labour; 4 = Project constructed; 5 = taken over from somebody else (though sale, gift or transfer, etc)

g: Species: TR = *Tilapia rendalli* (Chilinguni); OS = *Oreochromis shiranus* (Makumba); CG = *Clarias gariepinus* (Mlamba) OK = *Oreochromis karongae* (Chambo), CC = *Cyprinus carpio*

510. Do you want to expand your fish farming operations?

|     |    |
|-----|----|
| Yes | No |
|-----|----|

511. If you wanted to construct more ponds in the future, would you be able to access land with a continuous water supply?

|     |    |        |
|-----|----|--------|
| Yes | No | Unsure |
|-----|----|--------|

### Fish Farming Objectives

512. What are, or were your objectives for your fish farming activities?

| Type of Objective                                                                                                                        | Tick |
|------------------------------------------------------------------------------------------------------------------------------------------|------|
| a. To provide the households with a source of protein                                                                                    |      |
| b. To diversify the household's food sources.                                                                                            |      |
| c. To produce fish for distribution to family, friends and neighbours for the purpose of building and strengthening social relationships |      |
| d. To produce fish for sale to generate income                                                                                           |      |
| e. To increase the social status of the household/person                                                                                 |      |
| f. Because you are interested in it (Hobby) or want to experiment with new productive activities                                         |      |
| g. For educational and community development purposes.                                                                                   |      |
| h. Other                                                                                                                                 |      |

### Sources of fingerlings

513. Where have they obtained fingerlings?

| Source of fingerlings                                  | Tick | Species |
|--------------------------------------------------------|------|---------|
| a. Donations from neighbours/kin                       |      |         |
| b. Purchase from neighbours                            |      |         |
| c. Purchase from other fish farmers (Who?).....        |      |         |
| d. Purchase from Department of Fisheries (Where?)..... |      |         |
| e. Self-production                                     |      |         |
| f. Other                                               |      |         |

514. Indicate in the table below whether it is difficult to get access to different types of fingerlings or not and why.

| Species | Difficult Y/N | Why? |
|---------|---------------|------|
| a. TR   |               |      |
| b. OS   |               |      |
| c. CG   |               |      |
| d. OK   |               |      |
| e. CC   |               |      |

515a. What is the your preferred species for fingerlings? .....

515b Why? .....

## FISH FEEDING ACTIVITIES DURING THE LAST YEAR

516. Indicate the relative amount of each food source fed to fish in each month. Rank the supply of each feed source for each month from 0–2. (2 being the largest quantity of feed)

| Food Source              | Jan | Feb | Mar | Apr | May | June | Jul | Aug | Sept | Oct | Nov | Dec |
|--------------------------|-----|-----|-----|-----|-----|------|-----|-----|------|-----|-----|-----|
| a. Manure<br>(type)..... |     |     |     |     |     |      |     |     |      |     |     |     |
| b. Compost               |     |     |     |     |     |      |     |     |      |     |     |     |
| c. Maize bran            |     |     |     |     |     |      |     |     |      |     |     |     |
| d. Rice bran             |     |     |     |     |     |      |     |     |      |     |     |     |
| e. Cassava               |     |     |     |     |     |      |     |     |      |     |     |     |
| f. Soya                  |     |     |     |     |     |      |     |     |      |     |     |     |
| g. Leaves/ Grass         |     |     |     |     |     |      |     |     |      |     |     |     |
| h. Vegetable matter      |     |     |     |     |     |      |     |     |      |     |     |     |
| i. Other:                |     |     |     |     |     |      |     |     |      |     |     |     |

*Manure types: Goat = 1; chicken = 2; cow = 3; pig = 4; rabbit = 5; Other = 6*

517. Do you provide your fish with supplementary feeds? | \_\_\_\_ | 1) Yes 2) No

518a. Do you give mineral premixes to your fish? | \_\_\_\_ | \_\_\_\_ |

1. Yes 2. No

518b. If yes, what is the source of the premix?

519. What is the cost of the mineral premix | \_\_\_\_ | \_\_\_\_ | packet

520. Do you face any problems with supplements feeding? | \_\_\_\_ | \_\_\_\_ |

1) Yes 2) No

521. What are the problems with supplement feeding?

1) High Cost of feed

2) Inadequate availability

3) Inconsistent supply

4) Other specify \_\_\_\_\_

523. How do you treat disease outbreak of your fish | \_\_\_\_ | \_\_\_\_ |

1. Yes 2. No

524. How often are your fish attacked by diseases? | \_\_\_\_ | \_\_\_\_ |

525a. Do you face major problems on disease disorders and treatments?

1. Yes 2. No

525b. If yes, what could be the possible cause of the case? |\_\_\_\_| |\_\_\_\_|

- 1) Fleas
- 2) Feeding (nutritional problems)
- 3) Worms
- 4) Injury
- 5) Calving (dystocia)
- 6) Other specify

524c. Number of treatments per growing season |\_\_\_\_|

524d. Total costs per growing season |\_\_\_\_| |\_\_\_\_|

### Harvesting of Fish

525. Which fish harvesting methods do you use?

| a. Break dyke /<br>total pond<br>drainage | b. Seine nets (less<br>than 1 inch) | c. Seine nets<br>(more than 1<br>inch) | d. Hook &<br>Line | e. Basket | f. Reed<br>fence | g. Other |
|-------------------------------------------|-------------------------------------|----------------------------------------|-------------------|-----------|------------------|----------|
|                                           |                                     |                                        |                   |           |                  |          |

526. If you have harvested using a net, do you own this net or did you hire/borrow it?

|         |                    |
|---------|--------------------|
| Own Net | Hired/Borrowed Net |
|---------|--------------------|

527. From whom did you hire or borrow the net?

.....  
.....  
.....

528. Do you keep records of your fish harvests?

|     |    |
|-----|----|
| Yes | No |
|-----|----|

529. Enumerator to ask if he can have a look at these records and rank the quality of these records.

|         |         |               |
|---------|---------|---------------|
| a. Good | b. Poor | c. No Records |
|---------|---------|---------------|

530a. Does the price that you receive for the same weight of small and large fish differ when you sell your fish?

|     |    |            |
|-----|----|------------|
| Yes | No | Don't know |
|-----|----|------------|

530b. If yes, for which do you receive a higher price?

|       |       |
|-------|-------|
| Large | Small |
|-------|-------|

530c. If you partially harvest fish from the pond/s for home consumption, how often do you catch fish in this way for each month of the last year?

| Jun | Jul | Aug | Sep | Oct | Nov | Dec | Jan | Feb | Mar | Apr | May |
|-----|-----|-----|-----|-----|-----|-----|-----|-----|-----|-----|-----|
|     |     |     |     |     |     |     |     |     |     |     |     |

For each month indicate whether partial harvesting takes place on a daily, weekly, monthly or irregular basis, or not at all. D = Daily, W = weekly, M = monthly, I = irregularly. No fishing = N

530d. How many fish do you catch at any one time when you partial harvest for home consumption?  
.....

530e. What is the average size of the fish caught when you partial harvest for home consumption?  
(Enumerator to obtain measure in hands and record in cm)  
.....

## FISH PRODUCTION AND MARKETING

531. Production and utilization

| Year | Unit | Production | HH consumption | Quantity sold | Unit price | Total value | Who buys? (See codes) |
|------|------|------------|----------------|---------------|------------|-------------|-----------------------|
| 2011 |      |            |                |               |            |             |                       |
| 2012 |      |            |                |               |            |             |                       |
| 2013 |      |            |                |               |            |             |                       |
| 2014 |      |            |                |               |            |             |                       |
| 2015 |      |            |                |               |            |             |                       |

**Codes. 1 Community members, 2 super markets/shops, 3 institutions, 4 other specify**

532a. Do you produce fingerlings? (Use code: 1 = yes, 2 = No) \_\_\_\_\_

532b. If yes, proceed to the table below.

| Year | Unit | Quantity sold | Unit price | Total value | Who buys? (See codes) |
|------|------|---------------|------------|-------------|-----------------------|
|      |      |               |            |             |                       |
| 2011 |      |               |            |             |                       |
| 2012 |      |               |            |             |                       |
| 2013 |      |               |            |             |                       |
| 2014 |      |               |            |             |                       |
| 2015 |      |               |            |             |                       |

**Codes. 1 Fellow farmers, 2 NGOs/CBOs, 3 research institutions, 4 other specify**

## LABOR COSTS

533. Who is normally involved in farming activities? |\_\_\_\_|\_\_\_\_|

- a. Family members
- b. Casual worker
- c. Both

534a. If Casual: Labour; How much do you pay for casual labour/day (Or per month)?  
MK\_\_\_\_\_

534b. Estimated Annual Cost.....

## INFORMATION ON FISH MARKETING (for the past 12 months)

535a. Where do you sell your fish? |\_\_\_\_|\_\_\_\_|

1. Urban markets 2. Middle men 3. Within the village 4. Other specify Local Market 5. Other specify\_\_\_\_\_

535b. What are the reasons for selling fish at this market? |\_\_\_\_|\_\_\_\_|

1. Better prices, 2. NGO encourages it, 3. Direct cash payment, 4. Closer to the farm

535c. How far are you from the nearest market? |\_\_\_\_|\_\_\_\_|

1. <1km 2) 1-1.9km 3) 2-2.9km 4) 3-3.9km 5) 4-4.9km 6. >5km

535d. How much do you pay for transporting fish to the market place? (If applicable)  
MK\_\_\_\_\_

535e. What was the average price of fish for the past 12months? MK |\_\_\_\_|\_\_\_\_|/ piece or Kilogram

536. What problems do you face with the marketing of your fish |\_\_\_\_|\_\_\_\_|

- 1. low fish prices
- 2. long distance
- 3. late payments
- 4. leadership at the club
- 5. Other ( Specify)\_\_\_\_\_

537. Which activity (ies) attract much costs on your fish farm?

- 1) Feed
- 2) Physical structures
- 3) Marketing costs
- 4) Labour
- 5) Other ( Specify)\_\_\_\_\_

## ACCESS TO EXTENSION SERVICES & CREDIT

538. Do you have access to extension services? | \_\_\_\_ | \_\_\_\_ |

1) No 2) Yes

539. Who provides fish farming extension services? | \_\_\_\_ | \_\_\_\_ |

1.) Government 2) NGO (Specify) \_\_\_\_\_ 3) Both

540. How often are you visited by extension agents per month?

.....  
 .....  
 .....

541a. Do you have lead farmers for fish farming? | \_\_\_\_ | \_\_\_\_ |

1) No 2) Yes

541b. If yes, explain how they are selected.

.....  
 .....  
 .....

542. What is the role for these lead farmers in fish farming?

.....  
 .....  
 .....

543. Do you think the lead farming model is very important in fish farming?

.....  
 .....  
 .....

544. Level of adoption of aquaculture technologies

| No. | Aquaculture technologies                     | Level of Adoption of technologies <sup>1)</sup> | Source of technology | Year |
|-----|----------------------------------------------|-------------------------------------------------|----------------------|------|
| a.  | Integrated fish farming                      |                                                 |                      |      |
| b.  | Use of manure in ponds                       |                                                 |                      |      |
| c.  | Direct feeding of fish with formulated feeds |                                                 |                      |      |
| d.  | Direct feeding of fish with maize bran       |                                                 |                      |      |
| e.  | Direct feeding of fish with vegetables       |                                                 |                      |      |
|     | Direct feeding of fish with indigenous feeds |                                                 |                      |      |
| f.  | Cleaning the ponds after harvest             |                                                 |                      |      |
| g.  | Using PVCs for outlets and inlets            |                                                 |                      |      |
| h.  | Improved fish breeds (Makumba)               |                                                 |                      |      |



| No.    | Aquaculture technologies                                                | Level of Adoption of technologies <sup>1)</sup> | Source of technology | Year |
|--------|-------------------------------------------------------------------------|-------------------------------------------------|----------------------|------|
| i.     | Use of indigenous technology to improve pond buffer system (use of ash) |                                                 |                      |      |
| j.     | Use of harpa system for breeding                                        |                                                 |                      |      |
| Others |                                                                         |                                                 |                      |      |
|        |                                                                         |                                                 |                      |      |

*Level of Adoption of technologies <sup>1)</sup> : 1 = Adopting, 2 =Not Adopting*

545. How does knowledge on new fish farming technologies trickle down to you?

.....

.....

.....

546. Does fish farming have different extension agents as compared to agriculture?

.....

.....

.....

547. Are you involved in on-farm research? If yes, explain how you were selected.

.....

.....

.....

548. What are the major problems faced by extension agents?

.....

.....

.....

549. Do you think the way information is disseminated in fish farming needs improvement. Please explain your response.

.....

.....

.....

550a. Do you have access to credit for your fish enterprise?

1) Yes 2) No

552b. If yes, what type of loan?

1) seed scheme

2) cash loan

3) Feed loan

4) other loans ( specify)\_\_\_\_\_

550c. What is the source of that loan?

Other (Specify)\_\_\_\_\_

551. What are the key challenges in your fish production enterprise (in order of importance)?

.....  
.....  
.....

### **FISH CAPTURING**

552a. Do you think it is better to combine capture fisheries and fish farming?

|     |    |
|-----|----|
| Yes | No |
|-----|----|

552b. If yes, please explain.....

.....

### **PERCEPTIONS OF FISH FARMING ACTIVITIES**

553a. Are you satisfied with your current fish production?

|     |    |
|-----|----|
| Yes | No |
|     |    |

553b. If no, why?

.....  
.....  
.....

554. What specific issues do you think need to be addressed in order for you to be more successful at fish farming?

.....  
.....  
.....

### **MODULE 6: CLIMATE CHANGE RISKS**

601. What are the biophysical changes that have occurred in the last 20 years?

.....  
.....  
.....

602. What are the impacts of these biophysical changes to your fish ponds and the community at large?

.....  
.....  
.....

603. When did you first notice that there has been significant change in climate/weather patterns?  
(Indicate the decade, e.g. 1980s) \_\_\_\_\_

604. How many drought/flood incidences have you witnessed in your lifetime?

(a) Drought incidences:  1=less than 3, 2= 4-6, 3= more than 6 incidences; 4 = Never witnessed

(b) Flood incidences:  1=less than 3, 2= 4-6, 3= more than 6 incidences; 4 = Never witnessed

605. In which decade, would you say there has been frequent adverse weather events or climate / weather patterns in this area? 1= 1980s, 2= 1990s, 3= 2000s, 4= Other specify

606. What type of extreme weather events have been common in this area in the last five years?  
(Multiple responses are allowed).

1= Increased drought incidences, 2= Increased flood incidences, 3= Extreme temperatures 4=Late rains 5=Dry spells 6=Early rains

607. Do you have access to the weather forecasting data/information from the meteorological department? 1= yes 2= no

608. What is the source of this weather forecasting information? (Multiple responses are allowed)

1.= Radio station; 2. = Newspaper; 3. = Extension workers; 4. = Friends in the village; 5. = Household (Family) members; 6. = Church; 8. = Meteorological Station; 7. Other specify

609. Do you know of any traditional methods/indicators of predicting weather? 1= yes 2= no

610. If YES to 1009 above, name these indicators/methods used to predict weather patterns

| Weather pattern        | Prediction Indicators |
|------------------------|-----------------------|
| Drought Year           |                       |
| Normal year (Rainfall) |                       |
| Flood Year             |                       |
| Very cold winters      |                       |
| Normal winters         |                       |
| Very hot summer        |                       |
| Normal summer          |                       |

611. Over the past five years, when did you experience these extreme weather events?

1= 2011  2= 2012  3= 2013  4= 2014  5= 2015

612. How often did you experience these extreme weather events?

1= 2011 ☐ 2= 2012 ☐ 3= 2013 ☐ 4= 2014 ☐ 5= 2015 ☐

613. In most cases, how long does these extreme weather events?

2011: 1= 1 week |\_\_\_| 2= 2 weeks |\_\_\_| 3= 1 month |\_\_\_| 4= three months |\_\_\_|

2012: 1= 1 week |\_\_\_| 2= 2 weeks |\_\_\_| 3= 1 month |\_\_\_| 4= three months |\_\_\_|

2013: 1= 1 week |\_\_\_| 2= 2 weeks |\_\_\_| 3= 1 month |\_\_\_| 4= three months |\_\_\_|

2014: 1= 1 week |\_\_\_| 2= 2 weeks |\_\_\_| 3= 1 month |\_\_\_| 4= three months |\_\_\_|

2015: 1= 1 week |\_\_\_| 2= 2 weeks |\_\_\_| 3= 1 month |\_\_\_| 4= three months |\_\_\_|

614. What common damages/ losses do people in this area usually experience due to extreme weather events?

1= Crop damage |\_\_\_| 2= Livestock loss |\_\_\_| 3= Loss of biodiversity |\_\_\_| 4= Scarcity of water |\_\_\_| 5= Low yields |\_\_\_| 6. Low fish catches |\_\_\_| 7 = Fishing vessels damage |\_\_\_| 8. Fishing gear damage |\_\_\_| 9 = Others specify

615. How has the prolonged dry spells affected your fish farming?

a. Negative

b. Positive

1. \_\_\_\_\_ 1

2. \_\_\_\_\_ 2

3. \_\_\_\_\_ 3

616. What are the observed changes in the rainfall patterns in the last 20- 30 years?

1= No changes |\_\_\_| 2= late onset of season |\_\_\_| 3= Early onset of the season |\_\_\_|

4= erratic |\_\_\_| 5= Poor distribution |\_\_\_|

617. What are the observed changes in the rainfall intensity in the last 20- 30 years?

1= Increasing |\_\_\_| 2. Decreasing |\_\_\_| 3. No change |\_\_\_|

## MODULE 7: PERCEPTIONS ON CLIMATE & ECOSYSTEM CHANGES

701. Have you noticed any significant changes in weather patterns over the years in relation to fish farming? 1= yes 2= no ☐

702. If **YES**, what changes have you observed?

*1=increased drought incidences, 2=increased floods, 3=poor rainfall distributions, 4=extremes in temperatures (e.g. very cold winters/frost/very hot summer), 5= persistent mvera winds 6 = other (specify)*

703. Which years did you get poor fish production in the past 20 years? \_\_\_\_\_

704. In your own view, what are the causes of fish production variability or change?

.....

.....

.....

705. From the time you observed changes in climate (weather conditions); to what level have you observed a corresponding change in the following;

| Variables               | Increased | Same | Declined |
|-------------------------|-----------|------|----------|
| a. Fish catches         |           |      |          |
| b. Aquatic biodiversity |           |      |          |
| c. Fish diseases        |           |      |          |
| d. Fish kills           |           |      |          |
| e. Ecosystem quality    |           |      |          |
|                         |           |      |          |

706. Has there been any changes to the ecosystem on the following:

| Variables                         | Increased | Same | Declined |
|-----------------------------------|-----------|------|----------|
| a. Number of trees                |           |      |          |
| b. Reeds                          |           |      |          |
| c. Wetlands                       |           |      |          |
| d. Rivers flow                    |           |      |          |
| e. Size of rivers (depth & width) |           |      |          |
| f. Soil type                      |           |      |          |
|                                   |           |      |          |

## MODULE 8: ANALYSIS OF ADAPTATION MEASURES TO CLIMATE CHANGE

801. What strategies have you put in place to adapt to climate change?

| Risks        | Strategies (Use codes below and fill each box, multiple answers possible) |  |  |  |  |
|--------------|---------------------------------------------------------------------------|--|--|--|--|
| Drought      |                                                                           |  |  |  |  |
| Floods       |                                                                           |  |  |  |  |
| Strong winds |                                                                           |  |  |  |  |
| Other_____   |                                                                           |  |  |  |  |

**Code:** 1=crop diversification, 2 =adjusting timing for farm operation, 3=Changes in tillage practices, 4= Irrigation , 5 =Efficient water use, 6=food rationing , 7 =digging deeper wells , 8 =rent , 9 =casual labor, 10= selling livestock , 11=IGA , 12= charcoal burning, 13= use of wild plant , 14= fishing, 15= migration, 16= selling household assets, 17 = Use efficient fishing gear, 18= other

802. What challenges and constraints are you facing in trying to adapt to climate change?

.....  
.....  
.....  
803. What interventions would you wish to be carried out to adapt to climate change impacts?

.....  
.....  
.....  
***END OF QUESTIONS, THANK YOU VERY MUCH FOR YOUR TIME!***
